# Supplementary material
Source: PubMed Central journal article supplement (PMC8892346)
Supplement: EMBR-23-e53365-s003.pdf [file EMBR-23-e53365-s003.pdf]

## Appendix

### Appendix for

### Exosome-like nanoparticles from Mulberry bark prevent DSS-induced colitis by AhR/COPS8 pathway

Mukesh K Sriwastva<sup>a#</sup>, Zhong-Bin Deng<sup>a#</sup>, Bomei Wang<sup>b</sup>, Yun Teng<sup>a</sup>, Anil Kumar<sup>a</sup>, Kumaran Sundaram<sup>a</sup>, Jingyao Mu<sup>a</sup>, Chao Lei<sup>a</sup>, Gerald W Dryden<sup>a,c,d</sup>, Fangyi Xu<sup>a</sup>, Lifeng Zhang<sup>a</sup>, Jun Yan<sup>a</sup>, Xiang Zhang<sup>e</sup>, Juw Won Park<sup>e,f</sup>, Michael L Merchant<sup>g</sup>, Nejat K Egilmez<sup>a</sup>, and Huang-Ge Zhang<sup>a,c\*</sup>

### Table of contents:

| S.No. | Description                           | Page number |
|-------|---------------------------------------|-------------|
| 1.    | Appendix figure S1                    | 2           |
| 2.    | Appendix figure S2                    | 4           |
| 3.    | Appendix figure S3                    | 6           |
| 4.    | Appendix figure S4                    | 8           |
| 5.    | Appendix Table S1: List of primers    | 9           |
| 6.    | Appendix Table S2: List of antibodies | 11          |

## Appendix figures

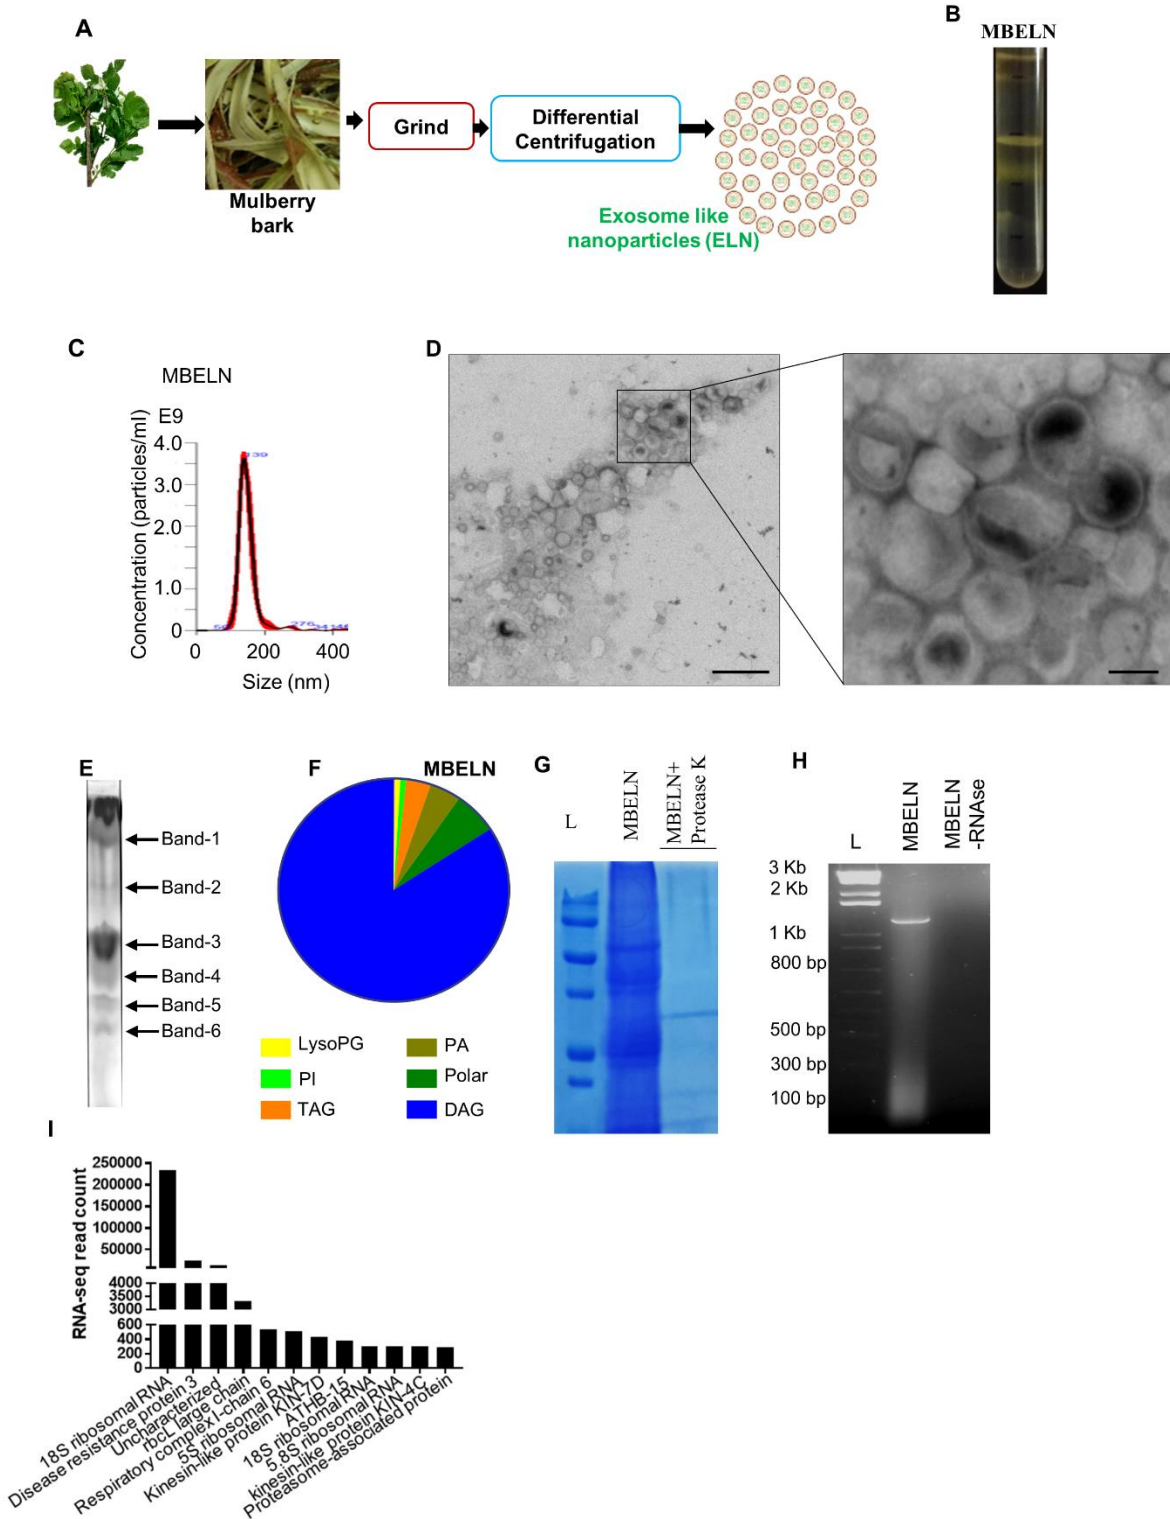

### Appendix fig S1. Preparation, characterization and phenotypic effect of mulberry bark derived exosome-like nanoparticles (MBELN).

(A) Schematic diagrams of the MBELN preparation process.

- (B) Size of MBELNs on the sucrose gradient. (n=3 biological replicates)
- (C) Graph showing size of MBELNs using NS300 NanoSight. (n=3 biological replicates)
- (D) Electron microscopy picture showing bilayer structure and size of MBELNs. Scale bar, 500 $\mu$ m (zoom scale bar 100  $\mu$ m). (n=3 biological replicates)
- (E) Thin layer liquid chromatography for lipid derived from MBELNs. (n=3 biological replicates)
- (F) Lipid profile showing differential lipid composition in MBELNs. (n=3 biological replicates)
- (G) Polyacrylamide gel electrophoresis showing presence of protein in MBELNs. (n=3 biological replicates)
- (H) Visualization of total RNA on 1% agarose gels. (n=3 biological replicates)
- (I) mRNA Seq analysis of MBELN derived RNA. (n=3 biological replicates)

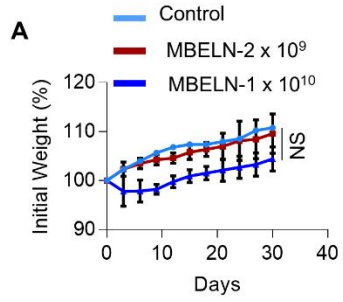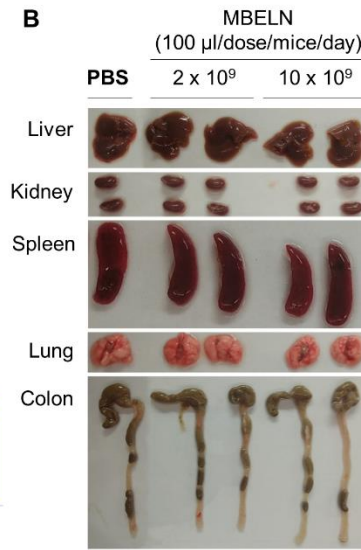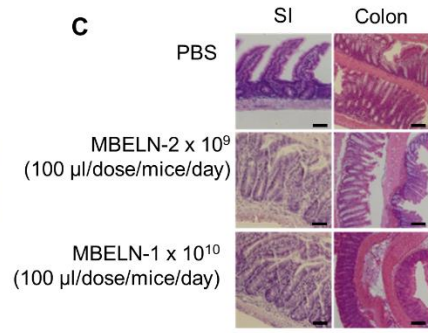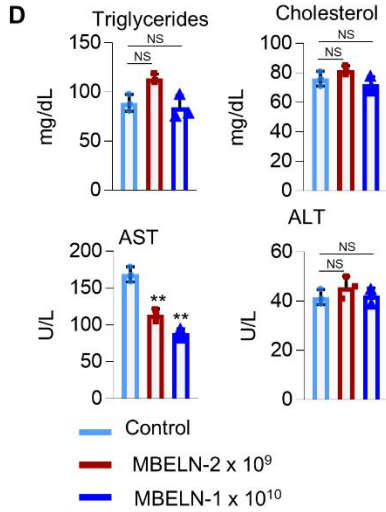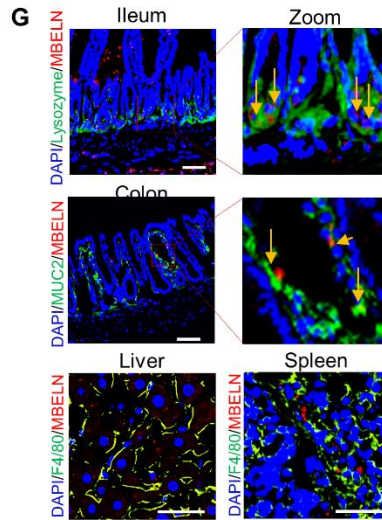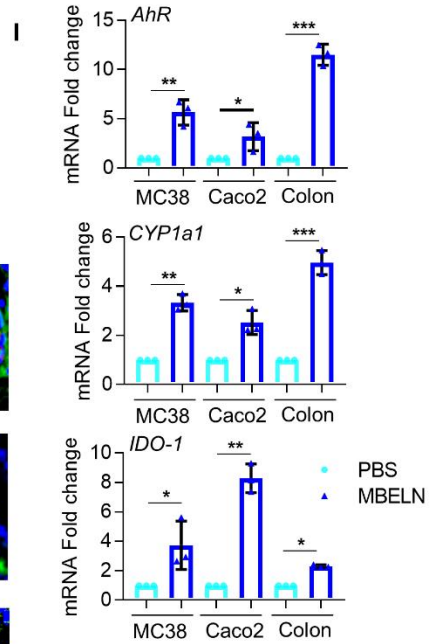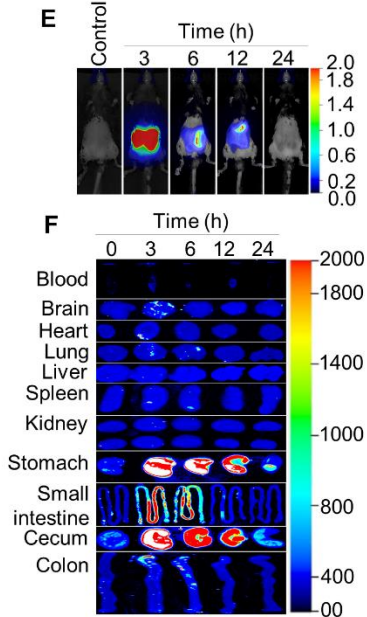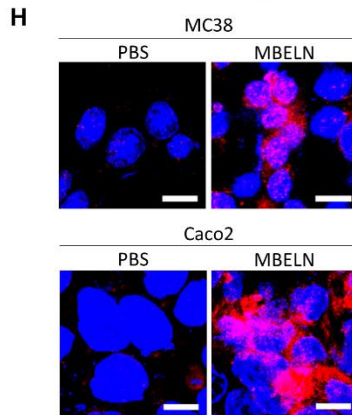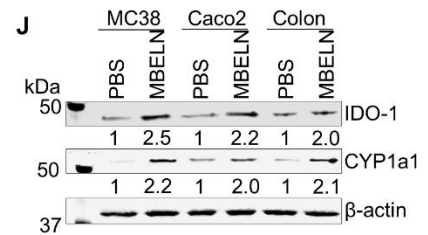

## Appendix fig S2.

- (A) Graph showing changes in initial weight of mice while treated with mulberry bark derived exosome-like nanoparticles (MBELN) at two different doses. Data are mean  $\pm$  SEM of five biological replicates, NS- non-significant using Mann–Whitney test.
- (B) Pictorial representation of morphological changes in internal organs while mice are treated with MBELN. (n=5 biological replicates)
- (C) Hematoxylin and eosin (HE) staining to show histological changes due to MBELN administration. Scale bar 100 $\mu$ m, n=5 biological replicates.
- (D) Graph showing plasma level of triglycerides, total cholesterol, aspartate transaminase (AST) and alanine aminotransferase (ALT) in mice treated with MBELN. Data are mean  $\pm$  SEM of three biological replicates \*\*P<0.01, NS- non-significant using one-way ANOVA.
- (E) *In vivo* imaging showing trafficking of DiR labeled MBELN. (n=5 biological replicates)
- (F) *Ex vivo* imaging showing localization of DiR labeled MBELNs in different organs. (n=5 biological replicates)
- (G) Distribution of PKH26 labelled MBELNs *in vivo* in C57BL/6 mice ileum (Paneth cells- yellow arrow), colon, liver and spleen tissues following oral administration of MBELNs. Scale bar, 100 $\mu$ m (n=3 biological replicates).
- (H) Confocal microscopy showing expression of total AhR in MC38 cells and Caco2 cells while being treated with MBELNs. Scale bar, 10 $\mu$ m (n=3 biological replicates).
- (I) *mRNA* expression of aryl hydrocarbon receptor (*AhR*), *Cytochrome P450, family 1, subfamily A, polypeptide 1 (CYP1a1)* and Indoleamine 2,3-dioxygenase (*IDO-1*) in MC38, Caco2 cells and colon epithelial cells. Data are mean  $\pm$  SEM. (n=3 biological replicates) \*P<0.05, \*\*P<0.01, \*\*\*P<0.001 using Student's t-test.
- (J) Western blot analysis of CYP1a1 and IDO-1 in MC38 cells, Caco2 cells and mice colon epithelial cells following administration of MBELN. Data are mean  $\pm$  SEM of three biological replicates, Student's t-test.

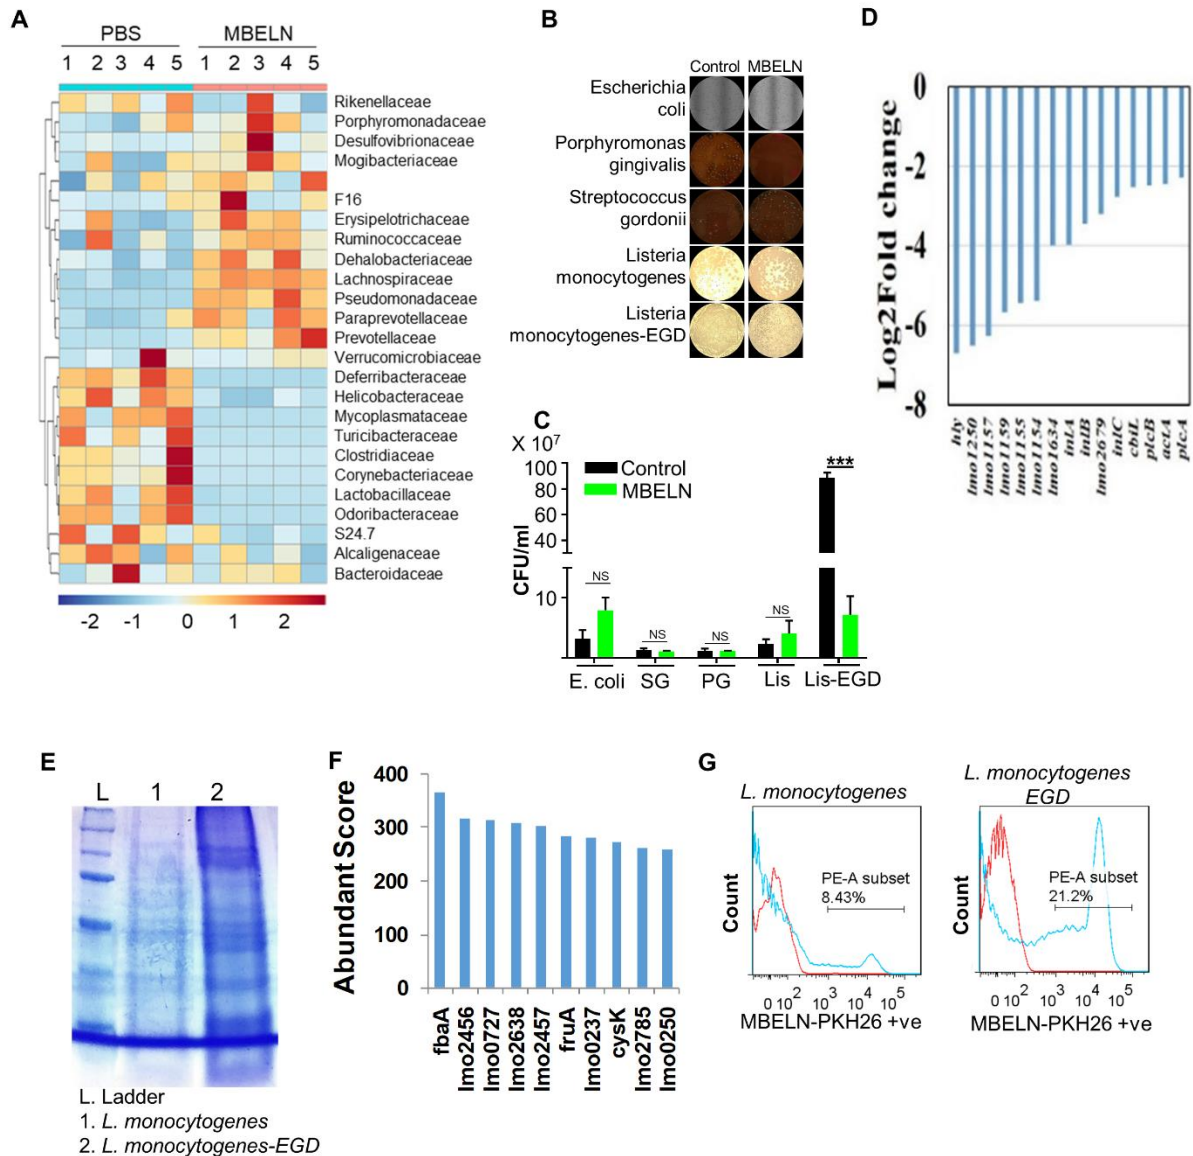

### Appendix figure S3.

(A) Effect of Mulberry bark derived exosome-like nanoparticles (MBELN) on microbiome profile of fecal bacteria at family level. (n=5 biological replicates)

(B-C) Bacteriostatic effect of MBELNs evaluated on *Escherichia coli* (*E. coli*), *Porphyromonas gingivalis* (PG), *Streptococcus gordonii* (SG), *Listeria monocytogenes* (Lis) and *Listeria monocytogenes-EGD* (Lis-EGD). Data are mean  $\pm$  SEM. \*\*\*p < 0.001, NS- non-significant using Student's t test.

(D) Change in mRNA level in *Listeria (L.) monocytogenes-EDG* compared to control (no treatment). (n=3 biological replicates)

(E) Virulent vs non-virulent *Listeria* proteins that bind with biotin labelled MBELNs and shown on an agarose gel. (n=3 biological replicates)

(F) Mass spectrometry (MS) analysis of protein samples: *Listeria (L.) monocytogenes* and *L. monocytogenes-EGD* total protein binding with biotin labelled MBELN protein. Top 10 most

abundant proteins from the virulent strain of *L. monocytogenes* shown interacting with MBELNs.  
(n=3 technical replicates)

(g) Uptake of PKH26 labelled MBELNs in the virulent and non-virulent strains of *L. monocytogenes*. (n=3 biological replicates)

**A**

>>HSP90\_Human 853 bp  
 Waterman-Eggert score: 3289; 682.9 bits; E(1) < 1.6e-200 (853 aa)  
 71.2% identity (87.1% similar) in 720 aa overlap (8-703:137-853)

```

10      20      30      40      50      60
HSPAB_ ETETFAFAQAEIQLLSLIINFYSNKEIFRLRELISNASDALDKIRFESLTKSKLDAQPE
HSP90_ EVETFAFAQAEIQLLSLIINFYSNKEIFRLRELISNASDALDKIRYRESLTPSKLDSGKE
140     150     160     170     180     190
HSPAB_ LFIKLVDPKASKTSLIISDGIKADLVNNGITARSGETKFMALQAGADVSMIGQFG
HSP90_ LHIHLIPNKQORTLTIVDTGIGMTKADLNNLGTIAKSGTKAFMEALQAGADISMIQFG
200     210     220     230     240     250
HSPAB_ VGFYSALVAEKVIVTKHNDDQVIMESQAGGSFVTRDTEGEQLGRGTITLFLKADQ
HSP90_ VGFYSALVAEKVIVTKHNDDQVIMESQAGGSFVTRDTEGEQLGRGTITLFLKADQ
260     270     280     290     300     310
HSPAB_ LEYLEERRKDLVKKHSEFISYIPLWTKTEKEISDDEEIEKKKEE-----
HSP90_ TEYLEERRKDLVKKHSEFISYIPLWTKTEKEISDDEEIEKKKEE-----
320     330     340     350     360     370
HSPAB_ -GDVEDV--DEEKESK---KRRKVKVSEHQLVKNQKPIWLRKPEITKDEYAFYK
HSP90_ KPEIEDVSGDEEKKDKGDKKKKIKKIKYIQEELNKKPIWLRKPEITKDEYAFYK
380     390     400     410     420     430
HSPAB_ SLTNDWEDHLAVKHFVSEVQLEFKAILFVPRAPFDLFDTRKKTNNIKLYRVRVIMDNC
HSP90_ SLTNDWEDHLAVKHFVSEVQLEFKAILFVPRAPFDLFDTRKKTNNIKLYRVRVIMDNC
440     450     460     470     480     490
HSPAB_ EELIPEYLGFKGVVSDPLNISREMLQNKILKIRKLVKCKIEMFNEIAENKEDY
HSP90_ EELIPEYLGFKGVVSDPLNISREMLQNKILKIRKLVKCKIEMFNEIAENKEDY
500     510     520     530     540     550
HSPAB_ AKFYDAFSKNLKGIHEDSQNRKALADLLRHYSTKSGDEMSTLKDVTVMKEGQKDIYYI
HSP90_ KKFYEQFSKNLKGIHEDSQNRKALADLLRHYSTKSGDEMSTLKDVTVMKEGQKDIYYI
560     570     580     590     600     610
HSPAB_ TGESKKAVENTSPFLERLKKGGYELVYMDAIDEYAVAGLKEYDGKLVSATKEGLKLDDE
HSP90_ TGETKQVANSFAVRLRKHGLEVIYMIPEIDYCVQQLKEFEGKLVSVTKEGLELP-E
620     630     640     650     660     670
HSPAB_ TEEEEKKKEKKSFENLCKTIKIDLGDKVEKVVSDRIVDSCCLVTGEYGTANMERI
HSP90_ DEEEKKKEKKSFENLCKTIKIDLGDKVEKVVSDRIVDSCCLVTGEYGTANMERI
680     690     700     710     720     730
HSPAB_ MKAQALRDSMSYSSKKTMEINPDNGIMEELRKRKRAVDKNDKSVKDLVLLFETALLT
HSP90_ MKAQALRDSMSYSSKKTMEINPDNGIMEELRKRKRAVDKNDKSVKDLVLLFETALLS
740     750     760     770     780     790
HSPAB_ SGFSLDPPNTFASRIHRMLKGLSIDDEAGADDT-----DMPPLEEAGNEESKMEVD
HSP90_ SGFSLDPPQTHANRIYRMKIKLGLSIDDEDDPTADDTSAAVTEEMPLE-GDDDTSRMEVD
800     810     820     830     840     850

```

**B**

| Score         | Expect                                                         | Method                       | Identities           | Positives    | Gaps       |
|---------------|----------------------------------------------------------------|------------------------------|----------------------|--------------|------------|
| 287 bits(735) | 4e-93                                                          | Compositional matrix adjust. | 174/499(35%)         | 272/499(54%) | 18/499(3%) |
| Query 28      | AIGIDIGTSQCSVAVWNGSQVELLKNTRNQKMMRSVYTKDDIPSGGVSNQLSNEHEMLS    |                              |                      |              | 87         |
| Sbjct 6       | A+GID+GT+ V V+ +VE++ N + + SYV + D + + N+ M                    |                              |                      |              | 63         |
| Query 88      | GAAIFNMKRLVGRVDTDPVVAHAKCSLPLVQTLDIGVRFIAALVNNHRSITPEEVMMA     |                              |                      |              | 146        |
| Sbjct 64      | +F+ KRL+GR D VV + K PF+V D G RP + +S PEEV +                    |                              |                      |              | 121        |
| Query 147     | IFLVELRAMAELQKLRPIRHVLTIPVSGFRFQLTRIERACAMAGHLVRLMPEPTAVAL     |                              |                      |              | 206        |
| Sbjct 122     | + L +++ +AE L + + + V+T+P F Q + + A +AGL+VLR++ EPTA A+         |                              |                      |              | 181        |
| Query 207     | LYAQQQQTTTHDNMGSGSEKIALIFNMGAGYTDVAVTATAGGVSQIRALAGSA-IGGEDL   |                              |                      |              | 265        |
| Sbjct 262     | Y ++ G+E+ LIF++G G DV++ G+ ++++ AG +GGED                       |                              |                      |              | 233        |
| Query 186     | LQNMWHYLLPNADTLFSSHSINEIKAMGLRVAQTQDAIHKLSQTQTSVPIINLD-LGMGSKI |                              |                      |              | 324        |
| Sbjct 234     | M+++ + +A+ LR A + A LS+ T I +D L G                             |                              |                      |              | 293        |
| Query 325     | NKVLHRQEFEEVNRKVFKECETLVQCLHDAKVEIEDVNDVIVVGGCSYIPKVDLVTSA     |                              |                      |              | 384        |
| Sbjct 294     | + R FEE+N +F V + L DAK++ ++D+++VGG + IPK++ L+                  |                              |                      |              | 353        |
| Query 385     | CKRKELYKGMNPLEAAVCGAALLEGAVASISDPFGNL-DLLTIQIATLAIGIRADGGNFI   |                              |                      |              | 443        |
| Sbjct 354     | KEL K +NP EA GAA++ A+ SG D N+ DLL + + L++GI GG                 |                              |                      |              | 411        |
| Query 444     | PIIPRNTTMAPKEMTFTTADHNTQEAIVVYEGEGQKVENHLLGYFKLVGIPPAKGA       |                              |                      |              | 503        |
| Sbjct 412     | +I RNTT+P ++ TFTT DNQ LI VYEGE ++N+LLG F++ GIPPAP+G            |                              |                      |              | 471        |
| Query 504     | PEISVCMVDVDSANLVRVFA 522                                       |                              | Query= Mulberry HPA8 |              |            |
| Sbjct 472     | P+I V D+DA+ +L V A 490                                         |                              | Subject= Human HSPA8 |              |            |

**Appendix fig S4.**

(A) Comparison and alignment of amino acid sequence of mulberry heat shock protein family A (Hsp70) member 8 (HSPA8) protein and human heat shock protein HSP90aa1.  
 (B) Comparison and alignment of amino acid sequence of mulberry and human heat shock protein family A (Hsp70) member 8 (HSPA8) protein.



**Appendix Table S1: List of primers**

| <b>Gene name</b>                                | <b>Forward sequence (5'-3')</b> | <b>Reverse sequence (5'-3')</b> |
|-------------------------------------------------|---------------------------------|---------------------------------|
| <b>Real-time PCR primers sequence for Human</b> |                                 |                                 |
| AhR                                             | CAAATCCTTCCAAGCGGC<br>ATA       | CGCTGAGCCTAAGAAGCTGAA<br>AG     |
| CYP1a1                                          | ATCCTGGAGACCTTCCGAC<br>A        | ACAAAGACACAACGCCCTT<br>A        |
| IDO1                                            | TTCAGTGCTTTGACGTCCT<br>G        | TGGAGGAACTGAGCAGCAT<br>G        |
| <b>Real-time PCR primers sequence for Mouse</b> |                                 |                                 |
| AhR                                             | GGCTTTCAGCAGTCTGATG<br>TC       | CATGAAAGAAGCGTTCTCTGG<br>TC     |
| CYP1a1                                          | CCTCATGTACCTGGTAACC<br>A        | AAGGATGAATGCCGGAAGGT<br>A       |
| IDO1                                            | TGAGCATTGCAAGGAAAG<br>TG        | TATAGGCCATCAGGCAGTCC<br>TG      |
| Defa-rs1                                        | CACCACCCAAGCTCCAAA<br>TACACAG   | ATCGTGAGGACCAAAAAGCAA<br>ATGG   |
| Defa1                                           | TGCCTGCTCATCCTAATCC             | GCTCCTCAGTTTTAGTCTCTTC          |
| Defa22                                          | TCCAAAACACAGATGAAG<br>AGAC      | GGCAGATCAGATCTCTCGAC<br>AGAC    |
| Defa21                                          | CCAGGGGAAGATGACCAG<br>GCTG      | TGCAGCGACGATTTCTACAAA<br>GGC    |
| CRS1C                                           | CACCACCCAAGCTCCAAA<br>TACACAG   | ATCGTGAGGACCAAAAAGCAA<br>ATGG   |
| CRS4C                                           | TCGCAGCCATGAAGAAAC              | CAAAAGAGACAGACACAGCC            |
| Reg3b                                           | TTCCTGTCCTCCATGATCA<br>AAA      | CATCCACCTCTGTTGGGTTCA<br>AAA    |

|               |                              |                              |
|---------------|------------------------------|------------------------------|
| REG3g         | ATGCTGCTCTCCTGCCTGA<br>TG    | CTAATGCGTGCGGAGGGTATA<br>TTC |
| Ang4          | ACTCTGGCTCAGAATGAA<br>AGGT   | TCACAGTATCTGTTCGTCCTCCG      |
| LYZ2          | TCAGCACGAGAGCAATTA<br>TAAC   | TTGCCATCATTACACCAGTAT<br>C   |
| COPS8         | AAGGAGACGCGCCTTTGC<br>C      | GTGGAAGAGGCTGTGAAAGG<br>C    |
| TNF- $\alpha$ | TCTATGGCCCAGACCCTCA<br>C     | GACGGCAGAGAGGAGGTTGA<br>C    |
| IL-17A        | TTTAACTCCCTTGGCGCAA<br>AA    | CTTTCCCTCCGCATTGACAC         |
| IFN- $\gamma$ | TCAGCAACAGCAAGGCGA<br>AAAAGG | CCACCCCGAATCAGCAGCGA         |

#### Gene cloning primers

|                     |                                                                             |                                                       |
|---------------------|-----------------------------------------------------------------------------|-------------------------------------------------------|
| Human AhR           | ATCATCATCACAGCAGCG<br>GCGCTCTGAATGGCTTTGT<br>ATTAGTTG                       | AAGGTTCTTTAAGTAATCTGT<br>CACGTATTTTCGTTTTTCGTA<br>TGC |
| HSPA8<br>(Mulberry) | AAAATCTATACTTCCAAGG<br>AGACTACAAAGACGATGA<br>CGACAAGATGGCTGAACA<br>AGCATAAC | TAGCAGCCTGTACTGAGGGAC<br>TATATTTTCTTCTGAACACTG<br>ACC |

AhR: aryl hydrocarbon receptor, CYP1a1: cytochrome P450 family 1 subfamily A member 1; Ahrr: aryl-hydrocarbon receptor repressor; Arnt: aryl hydrocarbon receptor nuclear translocator; IDO1: indoleamine 2,3-dioxygenase 1; Defa-rs1: defensin, alpha, related sequence 1; Defa: defensin, alpha; CRS: cryptdin-related sequence; Reg: regenerating islet-derived; Ang: angiogenin; LYZ: lysozymes; COPS8: COP9 constitutive photomorphogenic homolog subunit 8; HSPA8: heat shock protein family A (Hsp70) member 8; ZO-1: Zonula occludens-1; TNF- $\alpha$ : Tumor necrosis factor- $\alpha$ ; IL-17A: Interleukin 17A; IFN- $\gamma$ : Interferon gamma;.

**Appendix table S2: List of Antibodies and their details**

| <b>S. No.</b>                                                                                     | <b>Antibody-</b>                | <b>Application;</b> | <b>Company</b> | <b>(Catalog)</b> |
|---------------------------------------------------------------------------------------------------|---------------------------------|---------------------|----------------|------------------|
| 1.                                                                                                | COPS8-                          | WB, IF, IP;         | Abcam          | ab77300          |
| 2.                                                                                                | COPS5-                          | WB;                 | BIOMOL         | PW8365           |
| 3.                                                                                                | COPS6-                          | WB;                 | Santa Cruz     | Sc-393023        |
| 4.                                                                                                | COPS7-                          | WB;                 | Santa Cruz     | sc-398882        |
| 5.                                                                                                | Cullin 1-                       | WB;                 | EPITOMICS      | 2436-1           |
| 6.                                                                                                | Cullin 3-                       | WB;                 | EPITOMICS      | 2506-1           |
| 7.                                                                                                | CYP1a1-                         | WB;                 | Invitrogen     | PA5-15213        |
| 8.                                                                                                | IDO-1-                          | WB;                 | Proteintech    | 66528-1-IG       |
| 9.                                                                                                | AhR-                            | WB, IF, IP;         | Invitrogen     | MA1-514          |
| 10.                                                                                               | Nf-kB-                          | WB;                 | BD Biosciences | 610869           |
| 11.                                                                                               | $\beta$ -actin-                 | WB;                 | Santa Cruz     | sc-47778         |
| 12.                                                                                               | $\alpha$ -tubulin-              | WB;                 | Santa Cruz     | sc-5286          |
| 13.                                                                                               | Zonula occludens-1 (ZO-1)-      | WB;                 | Invitrogen     | 33-9100          |
| 14.                                                                                               | IL-17a-                         | ELISA;              | eBioscience™   | 14-7175-81       |
| 15.                                                                                               | IL-6-                           | ELISA;              | eBioscience™   | 14-7069-81       |
| 16.                                                                                               | TNF- $\alpha$ -                 | ELISA;              | eBioscience™   | 14-7325-81       |
| 17.                                                                                               | IL-10-                          | ELISA;              | eBioscience™   | 14-7101-81       |
| 18.                                                                                               | IL-1b-                          | ELISA;              | eBioscience™   | 14-7012-81       |
| 19.                                                                                               | IFN- $\gamma$ -                 | ELISA;              | eBioscience™   | 14-7313-81       |
| 20.                                                                                               | PE anti-mouse IL-17A-           | FC;                 | BioLegend      | 506904           |
| 21.                                                                                               | APC anti-mouse IL-17A-          | FC;                 | BioLegend      | 506916           |
| 22.                                                                                               | FITC anti-mouse IL-17A-         | FC;                 | BioLegend      | 506908           |
| 23.                                                                                               | FITC anti-human IFN- $\gamma$ - | FC;                 | BioLegend      | 502507           |
| 24.                                                                                               | APC anti-human IFN- $\gamma$ -  | FC;                 | BioLegend      | 506510           |
| 25.                                                                                               | PE anti-mouse FOXP3-            | FC;                 | BioLegend      | 126404           |
| 26.                                                                                               | APC anti-CD11b-                 | FC;                 | BioLegend      | 101212           |
| 27.                                                                                               | FITC anti-CD11b-                | FC;                 | BioLegend      | 101206           |
| 28.                                                                                               | PE anti-CD11b-                  | FC;                 | BioLegend      | 101208           |
| 29.                                                                                               | APC anti-CD4-                   | FC;                 | BioLegend      | 100412           |
| 30.                                                                                               | FITC anti-CD4-                  | FC;                 | BioLegend      | 100406           |
| 31.                                                                                               | PE anti-CD4-                    | FC;                 | BioLegend      | 100512           |
| 32.                                                                                               | PE/Cyanine7 anti-CD3-           | FC;                 | BioLegend      | 100220           |
| 33.                                                                                               | APC/Cyanine7 anti-CD3-          | FC;                 | BioLegend      | 100222           |
| 34.                                                                                               | PE/Cyanine7 anti-Gr-1-          | FC;                 | BioLegend      | 108416           |
| 35.                                                                                               | FITC anti-Ly-6G-                | FC;                 | BioLegend      | 127606           |
| 36.                                                                                               | PE anti-Ly-6G-                  | FC;                 | BioLegend      | 127608           |
| Abbreviation: WB-Western blot; IF-Immunofluorescence; IP-Immuno-precipitation; FC- Flow cytometry |                                 |                     |                |                  |
