# Supplementary material
Source: PubMed Central journal article supplement (PMC8892346)

**Source data fig 7A: Western blots showing expression of AhR in MC38 cells induced by different fractions (protein, lipid and RNA) derived from Mulberry bark derived exosome-like nanoparticle (MBELN).**

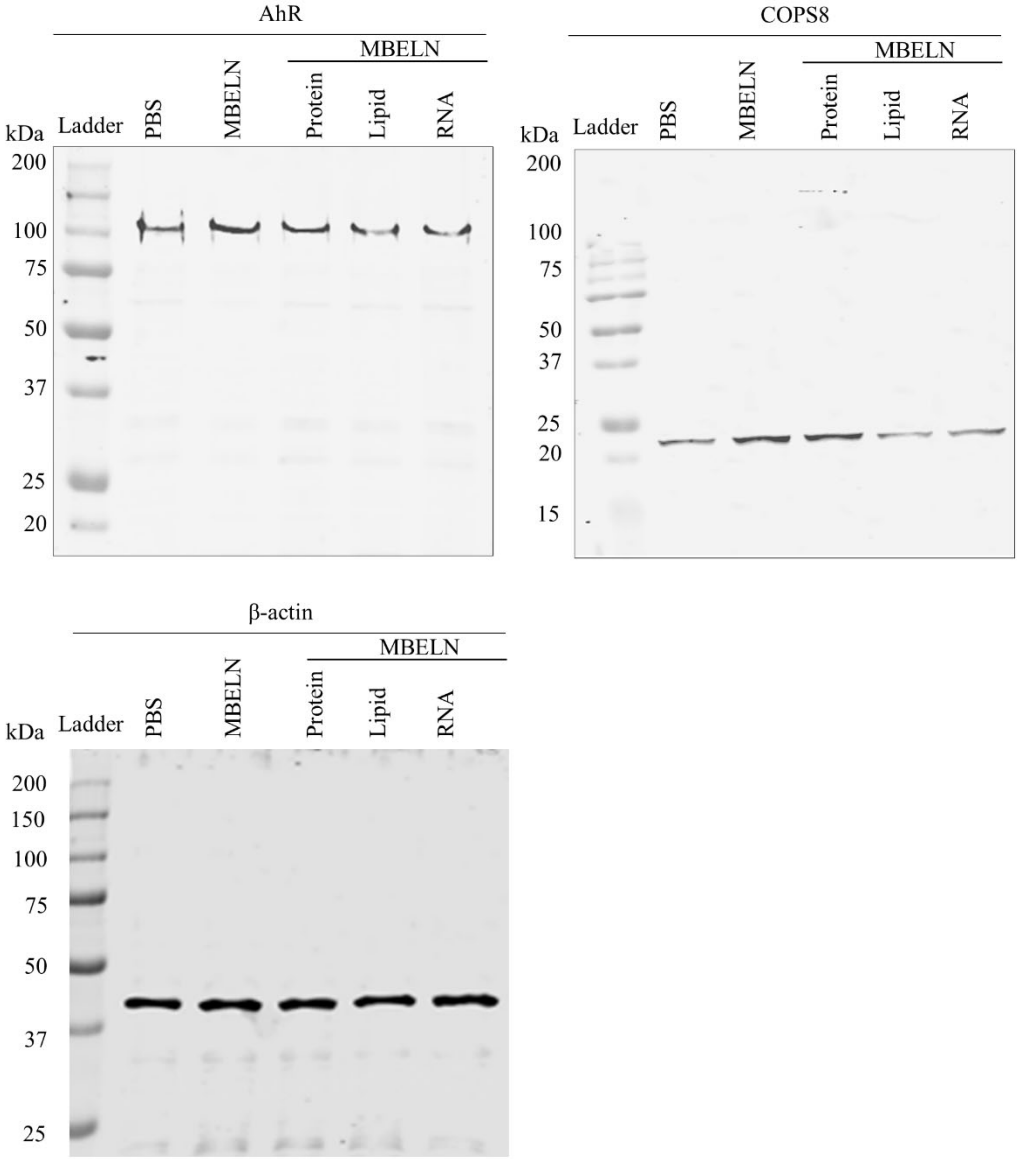

**Source data fig 7B: The effect of different size protein fractions of mulberry bark derived exosome-like nanoparticles (MBELNs) on the expression of aryl hydrocarbon receptor (AhR) demonstrated in western blots.**

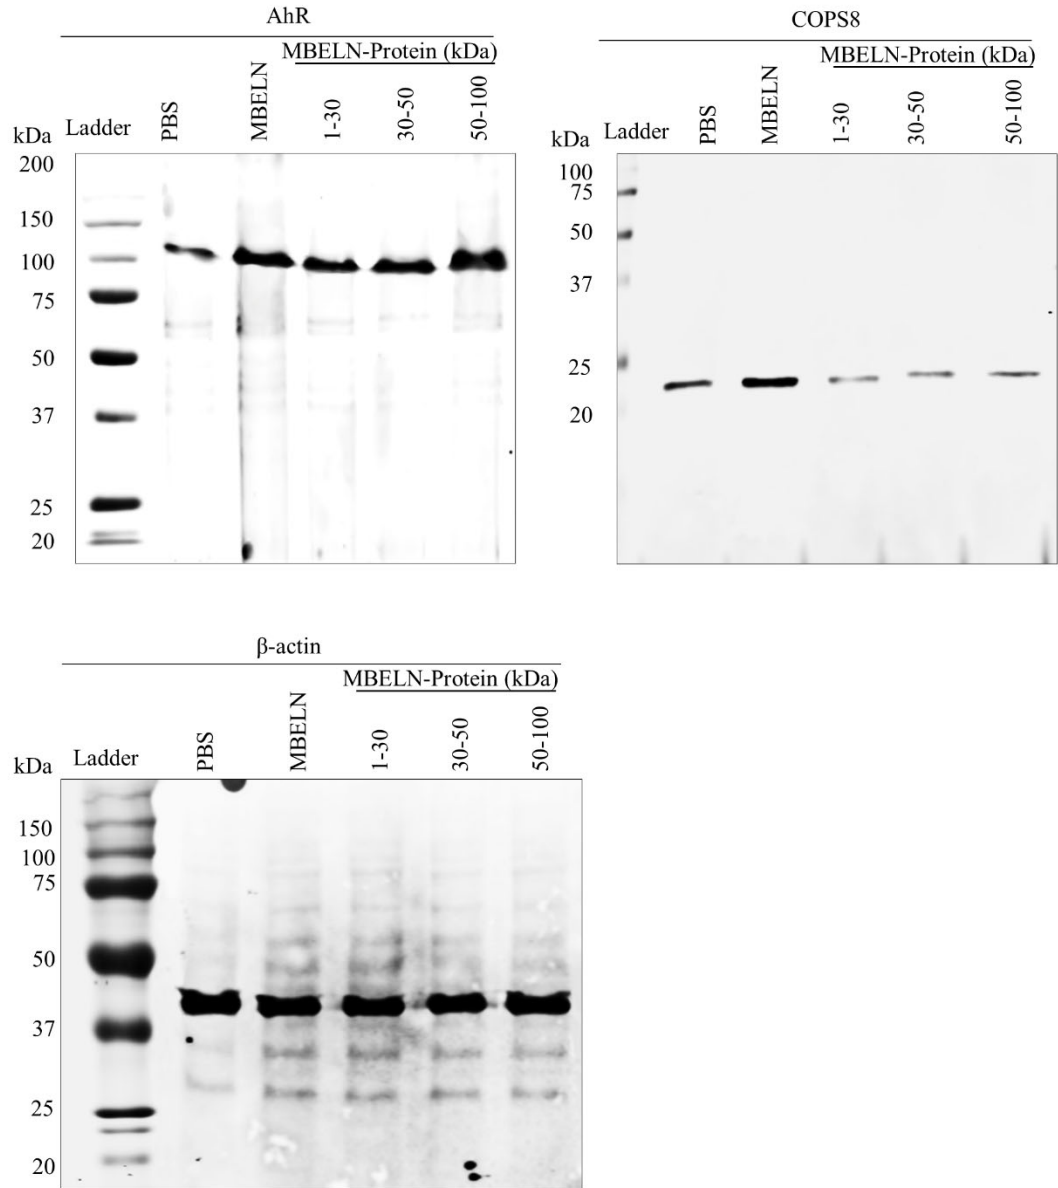

**Source data fig 7E: MC38 cells treated with MBELN-HSPA8 showing activation of AhR by western blot.**

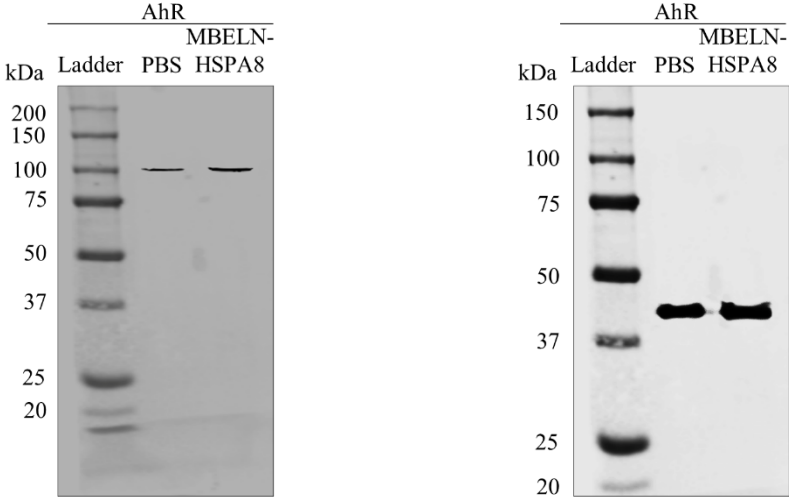

Supplement: EMBR-23-e53365-s004.pdf [file EMBR-23-e53365-s004.pdf]
