# Supplementary material
Source: PubMed Central journal article supplement (PMC8892346)

**Source data fig 1D: Protein expression of AhR in MC38 cells, Caco2 cells and colon epithelial cells after treatment with MBELNs.**

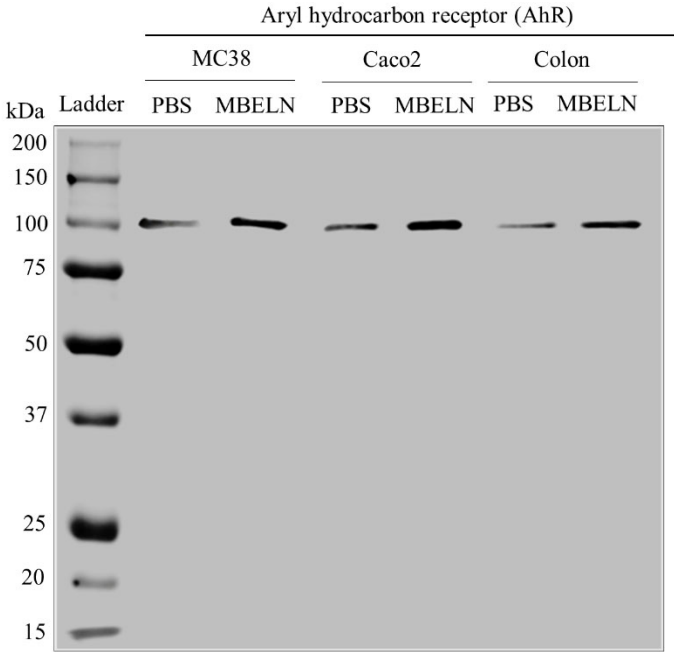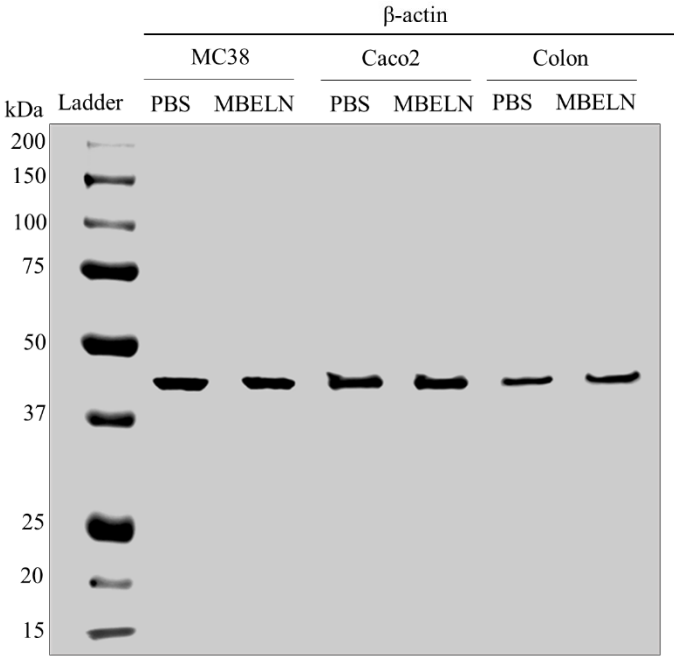

Supplement: EMBR-23-e53365-s010.pdf [file EMBR-23-e53365-s010.pdf]
