# Supplementary material
Source: PubMed Central journal article supplement (PMC8892346)

Source data fig 6G: Protein expression tight junction protein Zonula occludens-1 (ZO-1).

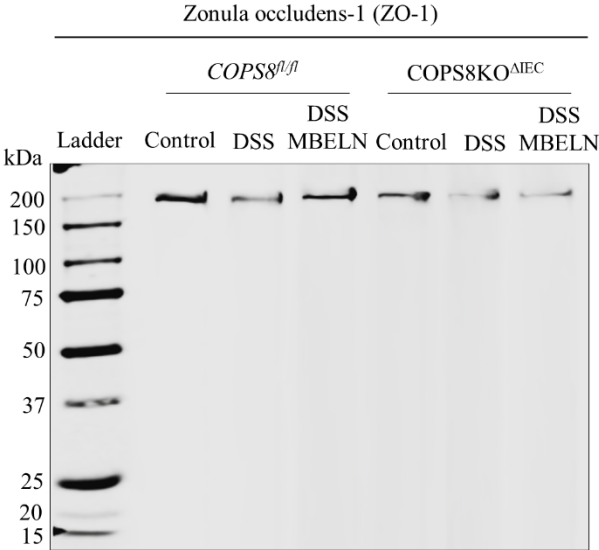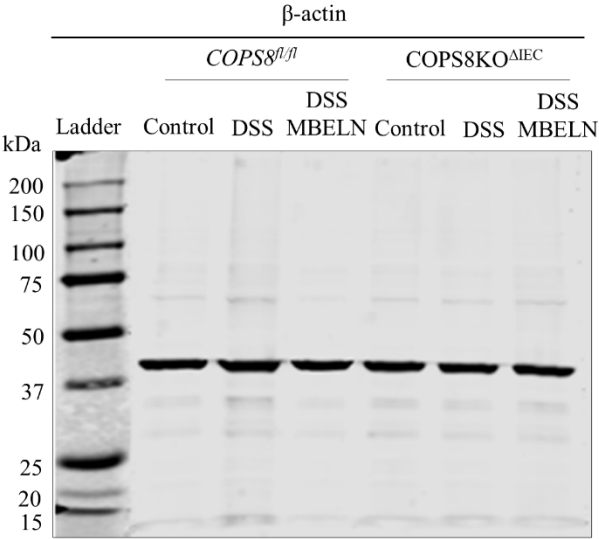

Supplement: EMBR-23-e53365-s005.pdf [file EMBR-23-e53365-s005.pdf]
